# Supplementary material
Source: PubMed Central journal article supplement (PMC2876676)
Supplement: supp_30_12_3004__1.pdf [file supp_30_12_3004__1.pdf]

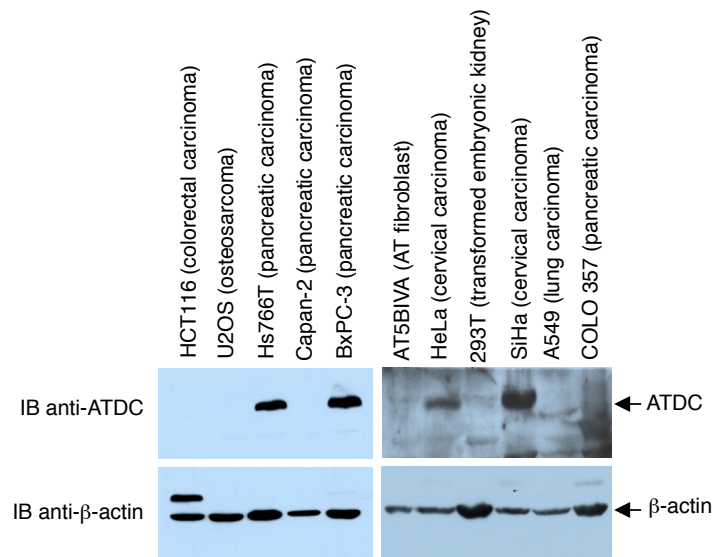

**Figure S1. ATDC expression in different cell lines.** ATDC protein levels are examined using an anti-ATDC antibody and Western blot of total cell lysates derived from different cell lines. Western blots of  $\beta$ -actin are used for loading controls.
