# Supplementary material
Source: PubMed Central journal article supplement (PMC2876676)
Supplement: supp_30_12_3004__2.pdf [file supp_30_12_3004__2.pdf]

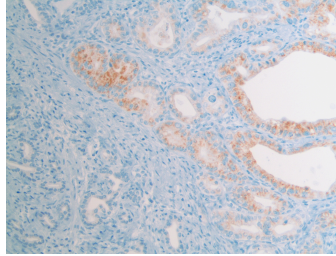

**Figure S2. Immunohistochemical analysis of ATDC expression.**  
A representative sample of anti-ATDC immunostaining of pancreatic cancer versus adjacent normal tissue.
