# Supplementary material
Source: PubMed Central journal article supplement (PMC2876676)
Supplement: supp_30_12_3004__3.pdf [file supp_30_12_3004__3.pdf]

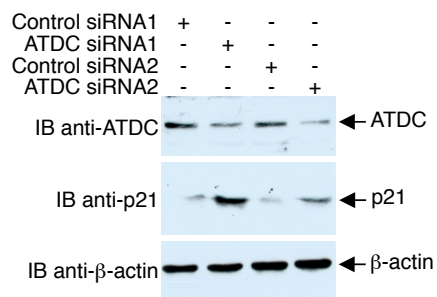

**Figure S3. Specificity of ATDC siRNA.** U2OS cells were transfected with control siRNA1 (Santa Cruz Biotechnology, Inc.), ATDC siRNA1 (Santa Cruz Biotechnology, Inc.), control siRNA2 (Dharmacon RNAi Technologies), or ATDC siRNA2 (Dharmacon RNAi Technologies). ATDC, p21, and  $\beta$ -actin protein expressions were assessed using Western blots with the indicated antibodies.
