# Supplementary material
Source: PubMed Central journal article supplement (PMC2876676)
Supplement: supp_30_12_3004__4.pdf [file supp_30_12_3004__4.pdf]

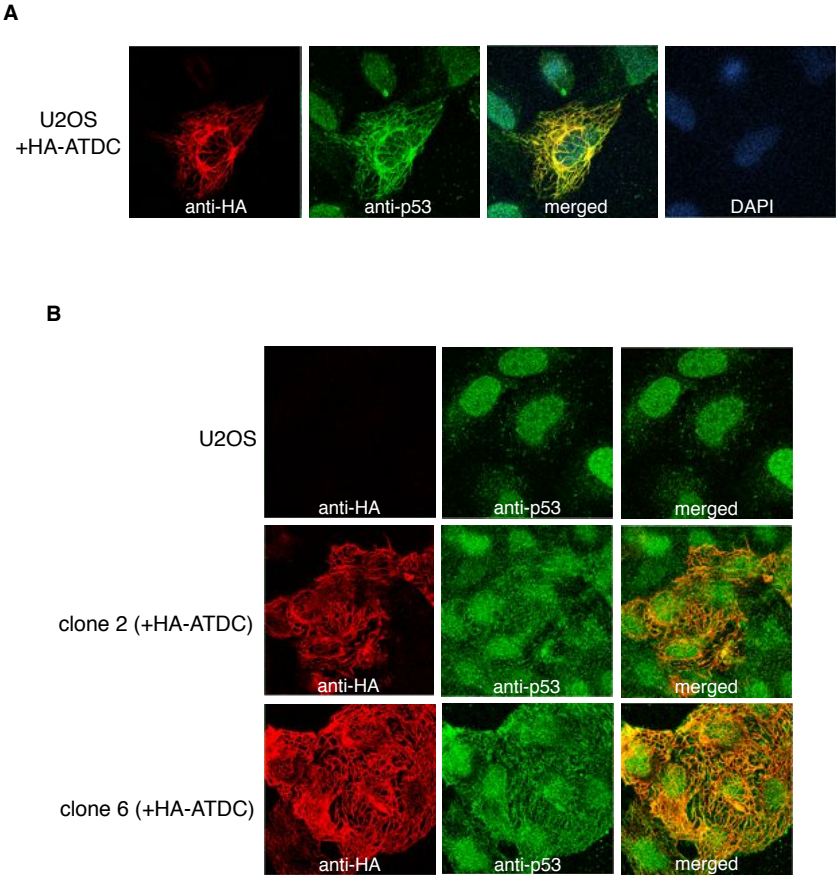

**Figure S4. ATDC alters p53 subcellular localization.** (A) Representative pictures of U2OS cells transiently transfected with plasmids expressing HA-ATDC, fixed, stained with antibodies or DAPI, and analyzed by confocal microscopy. (B) Representative pictures of U2OS cells transfected with the pcDNA3.1HA vector or stably expressing HA-ATDC, fixed, stained with antibodies, and analyzed by confocal microscopy.
