# Supplementary material
Source: PubMed Central journal article supplement (PMC2876676)
Supplement: supp_30_12_3004__5.pdf [file supp_30_12_3004__5.pdf]

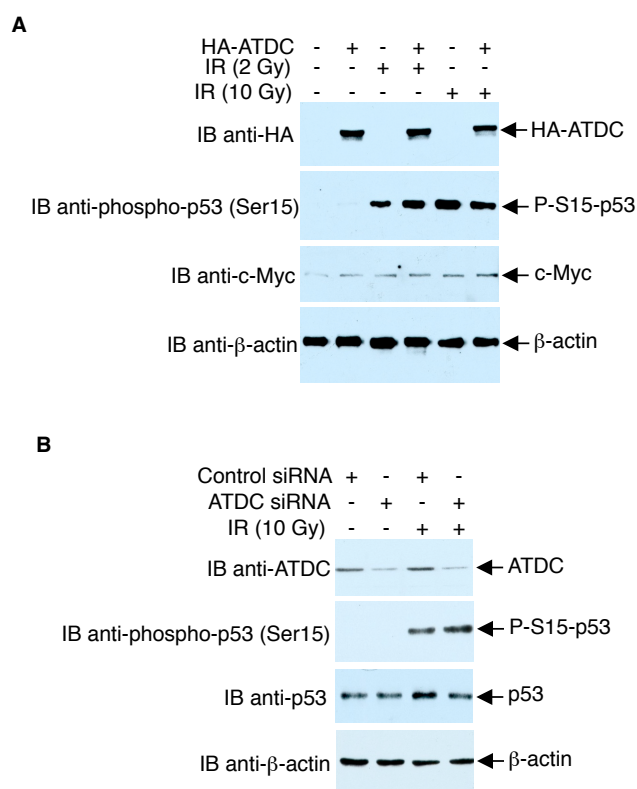

**Figure S5. Effects of ATDC on phospho-serine 15 of p53.** (A) U2OS cells were transfected with plasmids expressing HA-ATDC or the vector, and treated or untreated with IR. (B) SiHa cells were transfected with either a control siRNA or siRNA specific for ATDC, and treated or untreated with IR. Protein expressions were examined by Western blots using the indicated antibodies.
