# Supplementary material
Source: PubMed Central journal article supplement (PMC2876676)
Supplement: supp_30_12_3004__6.pdf [file supp_30_12_3004__6.pdf]

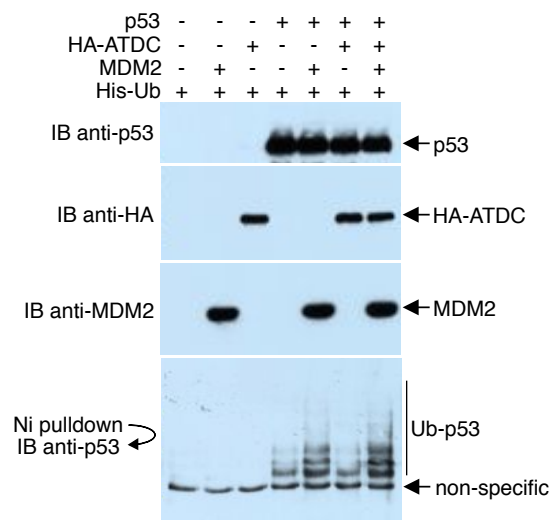

**Figure S6. ATDC has no effect on p53 expression or degradation.** H1299 cells were transfected with plasmids that express the indicated proteins. Cell lysates were prepared and divided into different aliquots. His-tagged proteins purified with Ni-NTA agarose were immunoblotted with an anti-p53 antibody. Remaining aliquots were immunoblotted with the indicated antibodies.
