# Supplementary material
Source: PubMed Central journal article supplement (PMC2876676)
Supplement: supp_30_12_3004__7.pdf [file supp_30_12_3004__7.pdf]

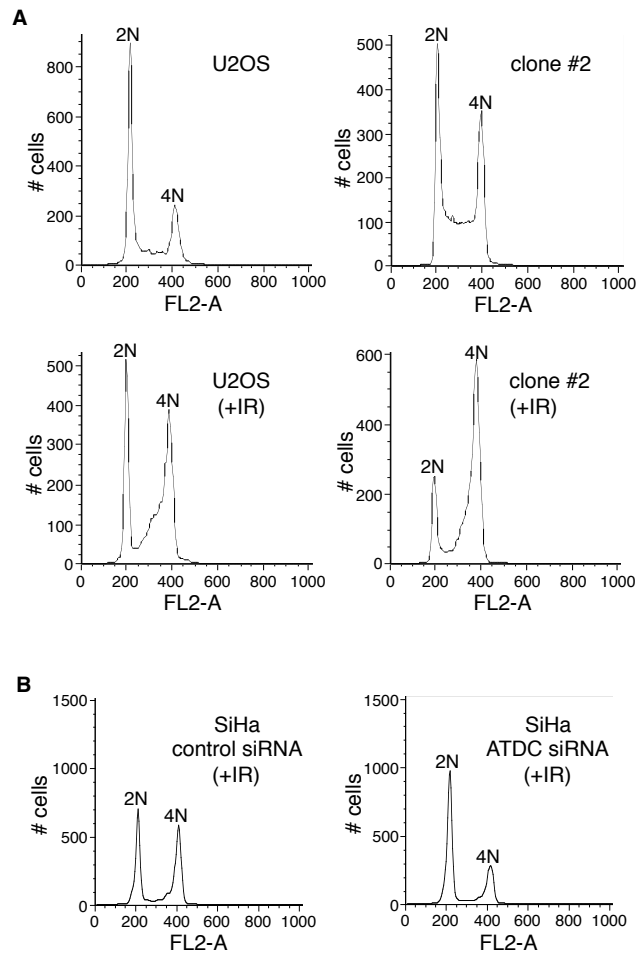

**Figure S7.** (A) Cellular DNA content was determined by flow cytometry for U2OS cells treated or untreated with IR (10 Gy) and transfected with the pcDNA3.1HA vector or stably expressing HA-ATDC. (B) Cellular DNA content was determined by flow cytometry for SiHa cells treated with IR (10 Gy) in the presence of control or ATDC siRNA.
