# Supplementary material
Source: PubMed Central journal article supplement (PMC2876676)
Supplement: supp_30_12_3004__8.pdf [file supp_30_12_3004__8.pdf]

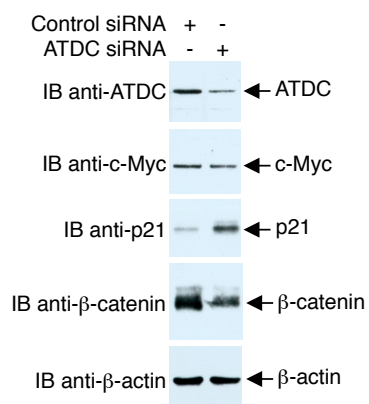

**Figure S8. Effects of ATDC on c-Myc and β-catenin expression.** SiHa cells were transfected with either a control siRNA or siRNA specific for ATDC, and protein expression is assessed by Western blots with the indicated antibodies.
